# Supplementary material for: Pregnancy-Induced Noncoding RNA (PINC) Associates with Polycomb Repressive Complex 2 and Regulates Mammary Epithelial Differentiation
Source: PLoS Genet. 2012 Jul 26;8(7):e1002840. doi: 10.1371/journal.pgen.1002840 (PMC3406180; doi:10.1371/journal.pgen.1002840)
Supplement: Table S1 — 436 gene probes are significantly changed in mPINC knockdown cells. This list includes all genes that are significantly altered following mPINC knockdown (p<0.01, FC>1.8 for either siPINC1.0/1.6 or siPINC relative to siNEG). (XLSX) [file pgen.1002840.s002.xlsx]

## Sheet: System development 
ENTREZ_GENE_ID	GENE NAME
58208	B-cell leukemia/lymphoma 11B
12606	CCAAT/enhancer binding protein (C/EBP), alpha
12500	CD3 antigen, delta polypeptide
63955	CDK5 and Abl enzyme substrate 1
353156	EGF-like domain 7
13841	Eph receptor A7
15245	Hedgehog-interacting protein
107250	Kazal-type serine peptidase inhibitor domain 1
239027	Rho GTPase activating protein 22
108105	UDP-GlcNAc:betaGal beta-1,3-N-acetylglucosaminyltransferase 5
11595	aggrecan
16790	alanyl (membrane) aminopeptidase
11576	alpha fetoprotein
74068	ankyrin repeat, SAM and basic leucine zipper domain containing 1
11876	artemin
117606	biregional cell adhesion molecule-related/down-regulated by oncogenes (Cdon) binding protein
20315	chemokine (C-X-C motif) ligand 12
320924	collagen and calcium binding EGF domains 1
12842	collagen, type I, alpha 1
12837	collagen, type VIII, alpha 1
329941	collagen, type VIII, alpha 2
12981	colony stimulating factor 2 (granulocyte-macrophage)
72383	cornifelin
12577	cyclin-dependent kinase inhibitor 1C (P57)
22240	dihydropyrimidinase-like 3
18605	ectonucleotide pyrophosphatase/phosphodiesterase 1
13614	endothelin 1
13874	epiregulin
14164	fibroblast growth factor 1
14371	frizzled homolog 9 (Drosophila)
14573	glial cell line derived neurotrophic factor
14734	glypican 3
230824	grainyhead-like 3 (Drosophila)
14456	growth arrest specific 6
15213	hairy/enhancer-of-split related with YRPW motif 1
15483	hydroxysteroid 11-beta dehydrogenase 1
16011	insulin-like growth factor binding protein 5
16193	interleukin 6
16687	keratin 6A
56735	keratin 71
16840	leukocyte cell derived chemotaxin 1
16948	lysyl oxidase
17762	microtubule-associated protein tau
17927	myogenic differentiation 1
18158	natriuretic peptide precursor type B
18185	neural retina leucine zipper gene
211323	neuregulin 1
53972	neuronal guanine nucleotide exchange factor
18654	placental growth factor
18793	plasminogen activator, urokinase receptor
18263	predicted gene 6742; ornithine decarboxylase, structural 1; similar to Ornithine decarboxylase (ODC); predicted gene 7993; predicted gene 15645; predicted gene 9115; predicted gene 7278
18552	proprotein convertase subtilisin/kexin type 5
98711	retinol dehydrogenase 10 (all-trans)
20348	sema domain, immunoglobulin domain (Ig), short basic domain, secreted, (semaphorin) 3C
20737	sialophorin
20754	small proline-rich protein 1B
20762	small proline-rich protein 2H
21923	tenascin C
21857	tissue inhibitor of metalloproteinase 1
22152	tubulin, beta 3; tubulin, beta 3, pseudogene 1
21926	tumor necrosis factor
22409	wingless related MMTV integration site 10a
22417	wingless-related MMTV integration site 4
22422	wingless-related MMTV integration site 7B

## Sheet: Anatomical StructureDevelopment
ENTREZ_GENE_ID	GENE NAME
58208	B-cell leukemia/lymphoma 11B
12606	CCAAT/enhancer binding protein (C/EBP), alpha
12500	CD3 antigen, delta polypeptide
63955	CDK5 and Abl enzyme substrate 1
353156	EGF-like domain 7
13841	Eph receptor A7
15245	Hedgehog-interacting protein
107250	Kazal-type serine peptidase inhibitor domain 1
239027	Rho GTPase activating protein 22
108105	UDP-GlcNAc:betaGal beta-1,3-N-acetylglucosaminyltransferase 5
11595	aggrecan
16790	alanyl (membrane) aminopeptidase
11576	alpha fetoprotein
74068	ankyrin repeat, SAM and basic leucine zipper domain containing 1
11876	artemin
117606	biregional cell adhesion molecule-related/down-regulated by oncogenes (Cdon) binding protein
20315	chemokine (C-X-C motif) ligand 12
320924	collagen and calcium binding EGF domains 1
12842	collagen, type I, alpha 1
12837	collagen, type VIII, alpha 1
329941	collagen, type VIII, alpha 2
12981	colony stimulating factor 2 (granulocyte-macrophage)
72383	cornifelin
12577	cyclin-dependent kinase inhibitor 1C (P57)
22240	dihydropyrimidinase-like 3
13132	disabled homolog 2 (Drosophila)
18605	ectonucleotide pyrophosphatase/phosphodiesterase 1
13614	endothelin 1
13874	epiregulin
14164	fibroblast growth factor 1
14371	frizzled homolog 9 (Drosophila)
14573	glial cell line derived neurotrophic factor
14734	glypican 3
230824	grainyhead-like 3 (Drosophila)
14456	growth arrest specific 6
15213	hairy/enhancer-of-split related with YRPW motif 1
15483	hydroxysteroid 11-beta dehydrogenase 1
16011	insulin-like growth factor binding protein 5
16193	interleukin 6
16687	keratin 6A
56735	keratin 71
16840	leukocyte cell derived chemotaxin 1
16948	lysyl oxidase
17762	microtubule-associated protein tau
17927	myogenic differentiation 1
18158	natriuretic peptide precursor type B
18185	neural retina leucine zipper gene
211323	neuregulin 1
53972	neuronal guanine nucleotide exchange factor
18654	placental growth factor
18793	plasminogen activator, urokinase receptor
18263	predicted gene 6742; ornithine decarboxylase, structural 1; similar to Ornithine decarboxylase (ODC); predicted gene 7993; predicted gene 15645; predicted gene 9115; predicted gene 7278
18552	proprotein convertase subtilisin/kexin type 5
98711	retinol dehydrogenase 10 (all-trans)
20348	sema domain, immunoglobulin domain (Ig), short basic domain, secreted, (semaphorin) 3C
20737	sialophorin
20754	small proline-rich protein 1B
20762	small proline-rich protein 2H
21923	tenascin C
21857	tissue inhibitor of metalloproteinase 1
22152	tubulin, beta 3; tubulin, beta 3, pseudogene 1
21926	tumor necrosis factor
22409	wingless related MMTV integration site 10a
22417	wingless-related MMTV integration site 4
22422	wingless-related MMTV integration site 7B

## Sheet: Developmental Process
ENTREZ_GENE_ID	GENE NAME
58208	B-cell leukemia/lymphoma 11B
12606	CCAAT/enhancer binding protein (C/EBP), alpha
12500	CD3 antigen, delta polypeptide
63955	CDK5 and Abl enzyme substrate 1
353156	EGF-like domain 7
13841	Eph receptor A7
15245	Hedgehog-interacting protein
107250	Kazal-type serine peptidase inhibitor domain 1
66107	RIKEN cDNA 1100001G20 gene
239027	Rho GTPase activating protein 22
108105	UDP-GlcNAc:betaGal beta-1,3-N-acetylglucosaminyltransferase 5
11595	aggrecan
16790	alanyl (membrane) aminopeptidase
11576	alpha fetoprotein
74068	ankyrin repeat, SAM and basic leucine zipper domain containing 1
11876	artemin
117606	biregional cell adhesion molecule-related/down-regulated by oncogenes (Cdon) binding protein
20315	chemokine (C-X-C motif) ligand 12
320924	collagen and calcium binding EGF domains 1
12842	collagen, type I, alpha 1
12837	collagen, type VIII, alpha 1
329941	collagen, type VIII, alpha 2
12981	colony stimulating factor 2 (granulocyte-macrophage)
72383	cornifelin
12577	cyclin-dependent kinase inhibitor 1C (P57)
76747	death associated protein-like 1
73712	dermokine
22240	dihydropyrimidinase-like 3
13132	disabled homolog 2 (Drosophila)
18605	ectonucleotide pyrophosphatase/phosphodiesterase 1
13614	endothelin 1
13874	epiregulin
14049	eyes absent 2 homolog (Drosophila)
14164	fibroblast growth factor 1
14371	frizzled homolog 9 (Drosophila)
14573	glial cell line derived neurotrophic factor
14734	glypican 3
230824	grainyhead-like 3 (Drosophila)
14456	growth arrest specific 6
15213	hairy/enhancer-of-split related with YRPW motif 1
244653	hydrocephalus inducing
15483	hydroxysteroid 11-beta dehydrogenase 1
16011	insulin-like growth factor binding protein 5
16193	interleukin 6
16687	keratin 6A
56735	keratin 71
16840	leukocyte cell derived chemotaxin 1
16948	lysyl oxidase
15235	macrophage stimulating 1 (hepatocyte growth factor-like)
17762	microtubule-associated protein tau
17927	myogenic differentiation 1
18158	natriuretic peptide precursor type B
18185	neural retina leucine zipper gene
211323	neuregulin 1
53972	neuronal guanine nucleotide exchange factor
75533	non-metastatic cells 5, protein expressed in (nucleoside-diphosphate kinase)
18654	placental growth factor
18793	plasminogen activator, urokinase receptor
18263	predicted gene 6742; ornithine decarboxylase, structural 1; similar to Ornithine decarboxylase (ODC); predicted gene 7993; predicted gene 15645; predicted gene 9115; predicted gene 7278
18552	proprotein convertase subtilisin/kexin type 5
98711	retinol dehydrogenase 10 (all-trans)
20348	sema domain, immunoglobulin domain (Ig), short basic domain, secreted, (semaphorin) 3C
20737	sialophorin
20754	small proline-rich protein 1B
20762	small proline-rich protein 2H
21923	tenascin C
21857	tissue inhibitor of metalloproteinase 1
21420	transcription factor AP-2, gamma
22152	tubulin, beta 3; tubulin, beta 3, pseudogene 1
21926	tumor necrosis factor
22409	wingless related MMTV integration site 10a
22417	wingless-related MMTV integration site 4
22422	wingless-related MMTV integration site 7B

## Sheet: Multicellular Organismal devlop
ENTREZ_GENE_ID	GENE NAME
58208	B-cell leukemia/lymphoma 11B
12606	CCAAT/enhancer binding protein (C/EBP), alpha
12500	CD3 antigen, delta polypeptide
63955	CDK5 and Abl enzyme substrate 1
353156	EGF-like domain 7
13841	Eph receptor A7
15245	Hedgehog-interacting protein
107250	Kazal-type serine peptidase inhibitor domain 1
239027	Rho GTPase activating protein 22
108105	UDP-GlcNAc:betaGal beta-1,3-N-acetylglucosaminyltransferase 5
11595	aggrecan
16790	alanyl (membrane) aminopeptidase
11576	alpha fetoprotein
74068	ankyrin repeat, SAM and basic leucine zipper domain containing 1
11876	artemin
117606	biregional cell adhesion molecule-related/down-regulated by oncogenes (Cdon) binding protein
20315	chemokine (C-X-C motif) ligand 12
320924	collagen and calcium binding EGF domains 1
12842	collagen, type I, alpha 1
12837	collagen, type VIII, alpha 1
329941	collagen, type VIII, alpha 2
12981	colony stimulating factor 2 (granulocyte-macrophage)
72383	cornifelin
12577	cyclin-dependent kinase inhibitor 1C (P57)
22240	dihydropyrimidinase-like 3
13132	disabled homolog 2 (Drosophila)
18605	ectonucleotide pyrophosphatase/phosphodiesterase 1
13614	endothelin 1
13874	epiregulin
14049	eyes absent 2 homolog (Drosophila)
14164	fibroblast growth factor 1
14371	frizzled homolog 9 (Drosophila)
14573	glial cell line derived neurotrophic factor
14734	glypican 3
230824	grainyhead-like 3 (Drosophila)
14456	growth arrest specific 6
15213	hairy/enhancer-of-split related with YRPW motif 1
244653	hydrocephalus inducing
15483	hydroxysteroid 11-beta dehydrogenase 1
16011	insulin-like growth factor binding protein 5
16193	interleukin 6
16687	keratin 6A
56735	keratin 71
16840	leukocyte cell derived chemotaxin 1
16948	lysyl oxidase
15235	macrophage stimulating 1 (hepatocyte growth factor-like)
17762	microtubule-associated protein tau
17927	myogenic differentiation 1
18158	natriuretic peptide precursor type B
18185	neural retina leucine zipper gene
211323	neuregulin 1
53972	neuronal guanine nucleotide exchange factor
75533	non-metastatic cells 5, protein expressed in (nucleoside-diphosphate kinase)
18654	placental growth factor
18793	plasminogen activator, urokinase receptor
18263	predicted gene 6742; ornithine decarboxylase, structural 1; similar to Ornithine decarboxylase (ODC); predicted gene 7993; predicted gene 15645; predicted gene 9115; predicted gene 7278
18552	proprotein convertase subtilisin/kexin type 5
98711	retinol dehydrogenase 10 (all-trans)
20348	sema domain, immunoglobulin domain (Ig), short basic domain, secreted, (semaphorin) 3C
20737	sialophorin
20754	small proline-rich protein 1B
20762	small proline-rich protein 2H
21923	tenascin C
21857	tissue inhibitor of metalloproteinase 1
22152	tubulin, beta 3; tubulin, beta 3, pseudogene 1
21926	tumor necrosis factor
22409	wingless related MMTV integration site 10a
22417	wingless-related MMTV integration site 4
22422	wingless-related MMTV integration site 7B

## Sheet: Cell Differentiation
ENTREZ_GENE_ID	GENE NAME
58208	B-cell leukemia/lymphoma 11B
12606	CCAAT/enhancer binding protein (C/EBP), alpha
12500	CD3 antigen, delta polypeptide
353156	EGF-like domain 7
13841	Eph receptor A7
15245	Hedgehog-interacting protein
107250	Kazal-type serine peptidase inhibitor domain 1
66107	RIKEN cDNA 1100001G20 gene
239027	Rho GTPase activating protein 22
11595	aggrecan
16790	alanyl (membrane) aminopeptidase
74068	ankyrin repeat, SAM and basic leucine zipper domain containing 1
11876	artemin
117606	biregional cell adhesion molecule-related/down-regulated by oncogenes (Cdon) binding protein
20315	chemokine (C-X-C motif) ligand 12
12842	collagen, type I, alpha 1
12981	colony stimulating factor 2 (granulocyte-macrophage)
72383	cornifelin
12577	cyclin-dependent kinase inhibitor 1C (P57)
76747	death associated protein-like 1
73712	dermokine
13132	disabled homolog 2 (Drosophila)
13614	endothelin 1
13874	epiregulin
14164	fibroblast growth factor 1
14371	frizzled homolog 9 (Drosophila)
14573	glial cell line derived neurotrophic factor
15213	hairy/enhancer-of-split related with YRPW motif 1
16011	insulin-like growth factor binding protein 5
16687	keratin 6A
16840	leukocyte cell derived chemotaxin 1
17762	microtubule-associated protein tau
17927	myogenic differentiation 1
18185	neural retina leucine zipper gene
211323	neuregulin 1
53972	neuronal guanine nucleotide exchange factor
75533	non-metastatic cells 5, protein expressed in (nucleoside-diphosphate kinase)
18654	placental growth factor
98711	retinol dehydrogenase 10 (all-trans)
20348	sema domain, immunoglobulin domain (Ig), short basic domain, secreted, (semaphorin) 3C
20737	sialophorin
20754	small proline-rich protein 1B
20762	small proline-rich protein 2H
21923	tenascin C
21857	tissue inhibitor of metalloproteinase 1
21420	transcription factor AP-2, gamma
22152	tubulin, beta 3; tubulin, beta 3, pseudogene 1
21926	tumor necrosis factor
22417	wingless-related MMTV integration site 4

## Sheet: Organ Development
ENTREZ_GENE_ID	GENE NAME
58208	B-cell leukemia/lymphoma 11B
12606	CCAAT/enhancer binding protein (C/EBP), alpha
12500	CD3 antigen, delta polypeptide
353156	EGF-like domain 7
15245	Hedgehog-interacting protein
239027	Rho GTPase activating protein 22
11595	aggrecan
16790	alanyl (membrane) aminopeptidase
11576	alpha fetoprotein
74068	ankyrin repeat, SAM and basic leucine zipper domain containing 1
20315	chemokine (C-X-C motif) ligand 12
320924	collagen and calcium binding EGF domains 1
12842	collagen, type I, alpha 1
12837	collagen, type VIII, alpha 1
329941	collagen, type VIII, alpha 2
12981	colony stimulating factor 2 (granulocyte-macrophage)
72383	cornifelin
18605	ectonucleotide pyrophosphatase/phosphodiesterase 1
13614	endothelin 1
13874	epiregulin
14164	fibroblast growth factor 1
14573	glial cell line derived neurotrophic factor
14734	glypican 3
230824	grainyhead-like 3 (Drosophila)
14456	growth arrest specific 6
15213	hairy/enhancer-of-split related with YRPW motif 1
15483	hydroxysteroid 11-beta dehydrogenase 1
16193	interleukin 6
16687	keratin 6A
56735	keratin 71
16840	leukocyte cell derived chemotaxin 1
16948	lysyl oxidase
17927	myogenic differentiation 1
18158	natriuretic peptide precursor type B
18185	neural retina leucine zipper gene
211323	neuregulin 1
18654	placental growth factor
18793	plasminogen activator, urokinase receptor
18263	predicted gene 6742; ornithine decarboxylase, structural 1; similar to Ornithine decarboxylase (ODC); predicted gene 7993; predicted gene 15645; predicted gene 9115; predicted gene 7278
18552	proprotein convertase subtilisin/kexin type 5
98711	retinol dehydrogenase 10 (all-trans)
20348	sema domain, immunoglobulin domain (Ig), short basic domain, secreted, (semaphorin) 3C
20737	sialophorin
20754	small proline-rich protein 1B
20762	small proline-rich protein 2H
21923	tenascin C
21857	tissue inhibitor of metalloproteinase 1
21926	tumor necrosis factor
22409	wingless related MMTV integration site 10a
22417	wingless-related MMTV integration site 4
22422	wingless-related MMTV integration site 7B

## Sheet: Cellular Developmental Process
ENTREZ_GENE_ID	GENE NAME
58208	B-cell leukemia/lymphoma 11B
12606	CCAAT/enhancer binding protein (C/EBP), alpha
12500	CD3 antigen, delta polypeptide
353156	EGF-like domain 7
13841	Eph receptor A7
15245	Hedgehog-interacting protein
107250	Kazal-type serine peptidase inhibitor domain 1
66107	RIKEN cDNA 1100001G20 gene
239027	Rho GTPase activating protein 22
11595	aggrecan
16790	alanyl (membrane) aminopeptidase
74068	ankyrin repeat, SAM and basic leucine zipper domain containing 1
11876	artemin
117606	biregional cell adhesion molecule-related/down-regulated by oncogenes (Cdon) binding protein
20315	chemokine (C-X-C motif) ligand 12
12842	collagen, type I, alpha 1
12981	colony stimulating factor 2 (granulocyte-macrophage)
72383	cornifelin
12577	cyclin-dependent kinase inhibitor 1C (P57)
76747	death associated protein-like 1
73712	dermokine
13132	disabled homolog 2 (Drosophila)
13614	endothelin 1
13874	epiregulin
14164	fibroblast growth factor 1
14371	frizzled homolog 9 (Drosophila)
14573	glial cell line derived neurotrophic factor
15213	hairy/enhancer-of-split related with YRPW motif 1
16011	insulin-like growth factor binding protein 5
16687	keratin 6A
16840	leukocyte cell derived chemotaxin 1
17762	microtubule-associated protein tau
17927	myogenic differentiation 1
18185	neural retina leucine zipper gene
211323	neuregulin 1
53972	neuronal guanine nucleotide exchange factor
75533	non-metastatic cells 5, protein expressed in (nucleoside-diphosphate kinase)
18654	placental growth factor
98711	retinol dehydrogenase 10 (all-trans)
20348	sema domain, immunoglobulin domain (Ig), short basic domain, secreted, (semaphorin) 3C
20737	sialophorin
20754	small proline-rich protein 1B
20762	small proline-rich protein 2H
21923	tenascin C
21857	tissue inhibitor of metalloproteinase 1
21420	transcription factor AP-2, gamma
22152	tubulin, beta 3; tubulin, beta 3, pseudogene 1
21926	tumor necrosis factor
22417	wingless-related MMTV integration site 4

## Sheet: Anatomical Structure Morphogene
ENTREZ_GENE_ID	GENE NAME
58208	B-cell leukemia/lymphoma 11B
353156	EGF-like domain 7
13841	Eph receptor A7
15245	Hedgehog-interacting protein
239027	Rho GTPase activating protein 22
11595	aggrecan
16790	alanyl (membrane) aminopeptidase
11876	artemin
117606	biregional cell adhesion molecule-related/down-regulated by oncogenes (Cdon) binding protein
20315	chemokine (C-X-C motif) ligand 12
320924	collagen and calcium binding EGF domains 1
12842	collagen, type I, alpha 1
12837	collagen, type VIII, alpha 1
329941	collagen, type VIII, alpha 2
13132	disabled homolog 2 (Drosophila)
13614	endothelin 1
13874	epiregulin
14164	fibroblast growth factor 1
14573	glial cell line derived neurotrophic factor
14734	glypican 3
14456	growth arrest specific 6
15213	hairy/enhancer-of-split related with YRPW motif 1
16193	interleukin 6
16687	keratin 6A
56735	keratin 71
18185	neural retina leucine zipper gene
211323	neuregulin 1
18654	placental growth factor
18793	plasminogen activator, urokinase receptor
18552	proprotein convertase subtilisin/kexin type 5
98711	retinol dehydrogenase 10 (all-trans)
20348	sema domain, immunoglobulin domain (Ig), short basic domain, secreted, (semaphorin) 3C
21923	tenascin C
21926	tumor necrosis factor
22409	wingless related MMTV integration site 10a
22417	wingless-related MMTV integration site 4
22422	wingless-related MMTV integration site 7B

## Sheet: Morphogenesis of a Branching 
ENTREZ_GENE_ID	GENE NAME
13841	Eph receptor A7
20315	chemokine (C-X-C motif) ligand 12
13614	endothelin 1
14573	glial cell line derived neurotrophic factor
14734	glypican 3
16193	interleukin 6
18654	placental growth factor
98711	retinol dehydrogenase 10 (all-trans)
20348	sema domain, immunoglobulin domain (Ig), short basic domain, secreted, (semaphorin) 3C
22417	wingless-related MMTV integration site 4

## Sheet: Tube Development
ENTREZ_GENE_ID	GENE NAME
12606	CCAAT/enhancer binding protein (C/EBP), alpha
15245	Hedgehog-interacting protein
74068	ankyrin repeat, SAM and basic leucine zipper domain containing 1
20315	chemokine (C-X-C motif) ligand 12
13614	endothelin 1
14164	fibroblast growth factor 1
14573	glial cell line derived neurotrophic factor
14734	glypican 3
15483	hydroxysteroid 11-beta dehydrogenase 1
16948	lysyl oxidase
18654	placental growth factor
18552	proprotein convertase subtilisin/kexin type 5
98711	retinol dehydrogenase 10 (all-trans)
22417	wingless-related MMTV integration site 4

[truncated: 4 more sheets: Response to Wounding, Tissue Development, Blood Vessel Development, Vasculature Development]
